# Supplementary material for: Composite Fe3O4-MXene-Carbon Nanotube Electrodes for Supercapacitors Prepared Using the New Colloidal Method
Source: MDPI journal article supplement (doi:10.3390/ma14112930), 2021-05-29
Supplement: s1 [file s1]

# Composite $\text{Fe}_3\text{O}_4$ -MXene-Carbon Nanotube Electrodes for Supercapacitors Prepared Using the New Colloidal Method

Wenyu Liang and Igor Zhitomirsky \*

Department of Materials Science and Engineering, McMaster University, Hamilton, ON L8S4L7, Canada;  
liangw26@mcmaster.ca

\* Correspondence: zhitom@mcmaster.ca

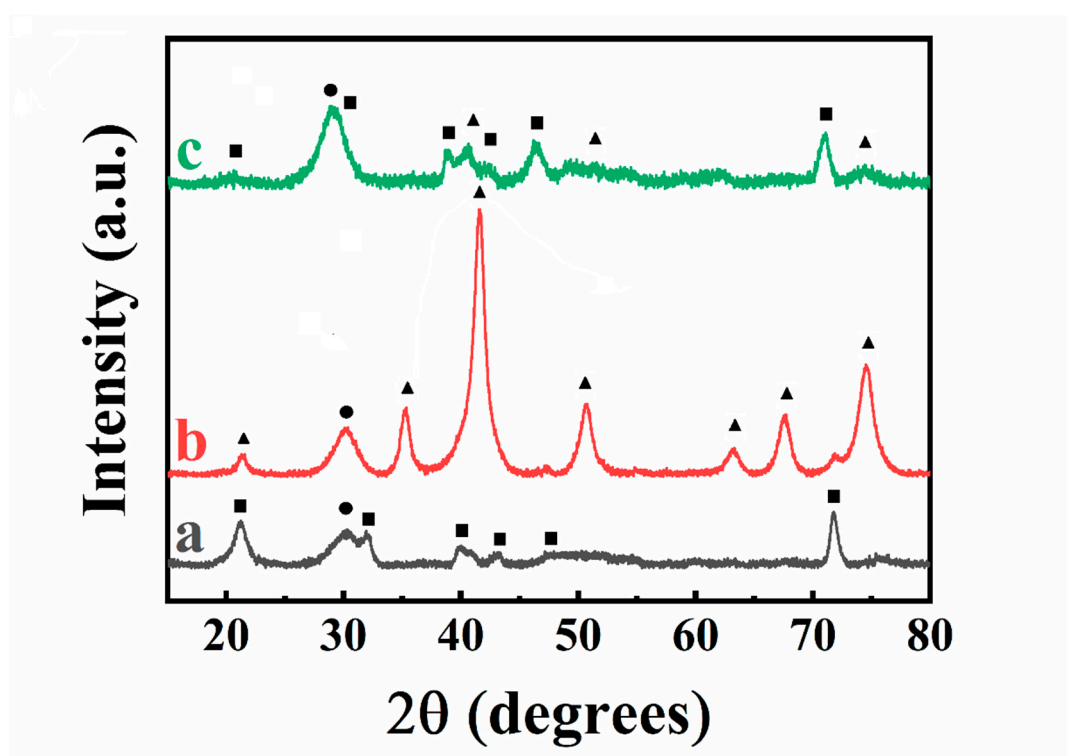

**Figure S1.** X-ray diffraction patterns of (a)  $\text{Ti}_3\text{C}_2\text{Tx}$ -CNT and (b)  $\text{Fe}_3\text{O}_4$ -CNT and (c)  $\text{Ti}_3\text{C}_2\text{Tx}$ - $\text{Fe}_3\text{O}_4$ -CNT composites (■ -  $\text{Ti}_3\text{C}_2\text{Tx}$ , ● - CNT, ▲ -  $\text{Fe}_3\text{O}_4$ ).

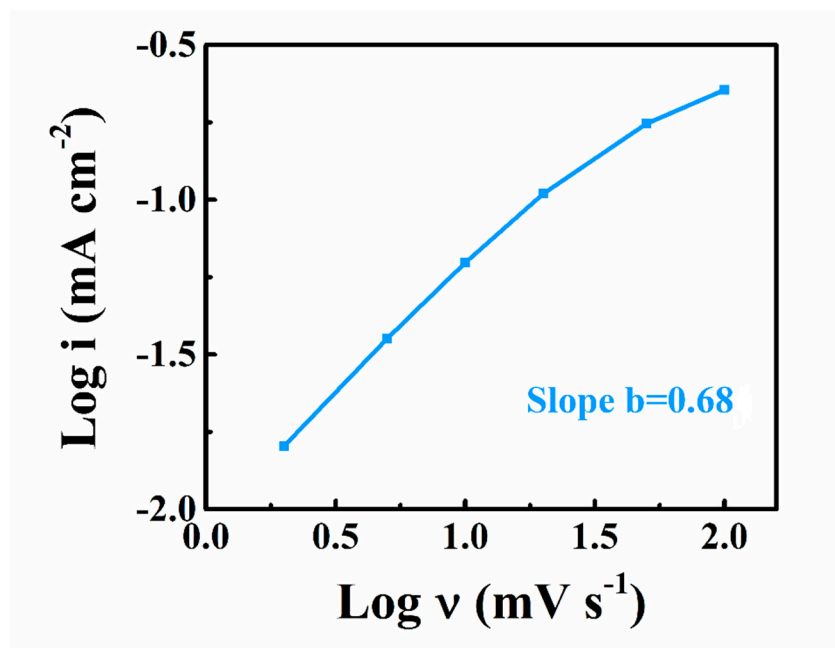

**Figure S2.** Current ( $i$ ) versus scan rate ( $v$ ) dependence in a logarithmic scale used for the calculation of parameter  $b$  for  $\text{Ti}_3\text{C}_2\text{T}_x\text{-Fe}_3\text{O}_4\text{-CNT}$  electrodes from the equation [1]  $i = av^b$ .

**Table S1.** Characteristics of  $\text{Ti}_3\text{C}_2\text{T}_x$ -based electrodes with high active mass in  $\text{Na}_2\text{SO}_4$  electrolyte.

| Material                                                           | Active Mass<br>$\text{mg}\cdot\text{cm}^{-2}$ | Potential Window  | Areal<br>Capacitance<br>$\text{F}\cdot\text{cm}^{-2}$ | Reference |
|--------------------------------------------------------------------|-----------------------------------------------|-------------------|-------------------------------------------------------|-----------|
| $\text{Ti}_3\text{C}_2\text{T}_x\text{-acetylene black}$           | 20                                            | 0–0.9V*           | 1.087                                                 | [2]       |
| $\text{Ti}_3\text{C}_2\text{T}_x\text{-CNT}$                       | 35                                            | –1.1–0.3 V vs SCE | 1.93                                                  | [3]       |
| $\text{Ti}_3\text{C}_2\text{T}_x\text{-CNT}$                       | 40                                            | –1.1–0.3 V vs SCE | 2.26                                                  | [4]       |
| $\text{Ti}_3\text{C}_2\text{T}_x\text{-Fe}_3\text{O}_4\text{-CNT}$ | 35                                            | –1.1–0.3 V vs SCE | 5.52                                                  | This work |

•Measurements performed in two electrode configuration

## Reference

- Okhay, O.; Tkach, A.; Graphene/Reduced Graphene Oxide-Carbon Nanotubes Composite Electrodes: From Capacitive to Battery-Type Behaviour. *Nanomaterials* **2021**, *11*, 1240.
- Guo, M.; Liu, C.; Zhang, Z.; Zhou, J.; Tang, Y.; Luo, S. Flexible  $\text{Ti}_3\text{C}_2\text{T}_x\text{@Al}$  electrodes with ultrahigh areal capacitance: in situ regulation of interlayer conductivity and spacing. *Adv. Funct. Mater.* **2018**, *28*, 1803196.
- Liang, W.; Zhitomirsky, I.; MXene-carbon nanotube composite electrodes for high active mass asymmetric supercapacitors. *J. Mater. Chem. A* **2021**, *9*, 10335–10344.
- Li, X.; Zhu, J.; Liang, W.; Zhitomirsky, I.; MXene ( $\text{Ti}_3\text{C}_2\text{T}_x$ ) Anodes for Asymmetric Supercapacitors with High Active Mass Loading. *Mater. Chem. Phys.* **2021**, in press.
